# Supplementary material
Source: Springer Nature journal article supplement (https://www.springermedizin.de/resource/supplementary/12936_2011_1812_MOESM1_ESM.pdf/9541824)
Supplement: MOESM1 [file 9541824]

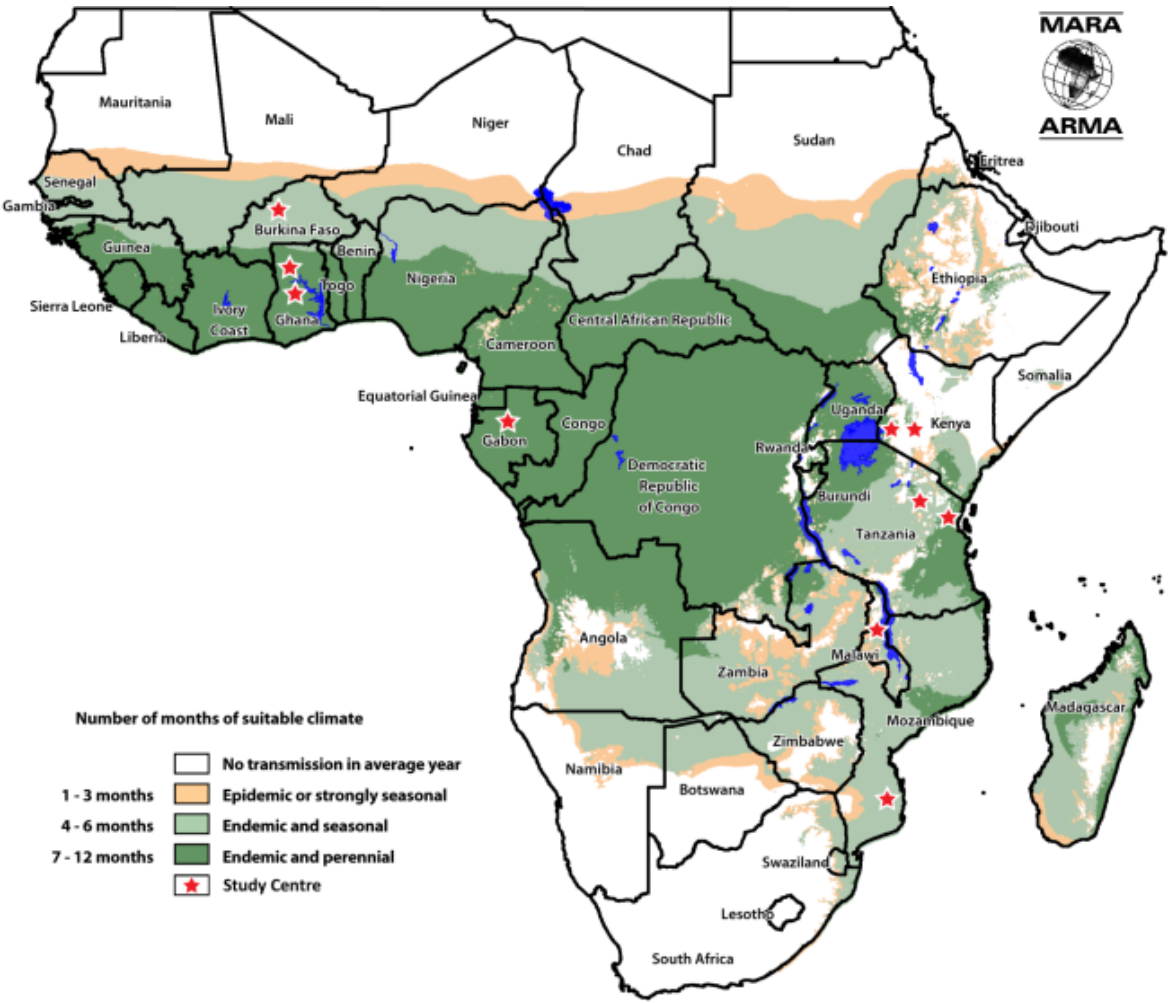

**Southern partners**

- Institut de Recherche en Science de la Santé, Burkina Faso
- Albert Schweitzer Hospital, Gabon
- Kintampo Health Research Centre, Ghana
- Kumasi Centre for Collaborative Research, Ghana
- School of Medical Sciences, Kwame Nkrumah University of Science and Technology, Ghana
- KEMRI/CDC Research and Public Health Collaboration, Kenya
- KEMRI-Walter Reed Project, Kenya
- KEMRI-Wellcome Trust Research Programme, Kenya
- University of North Carolina Project, Malawi
- Centro de Investigação em Saude de Manhica, Mozambique
- Ifakara Health Institute, Tanzania
- National Institute of Medical Research, Tanzania

**Northern partners**

- Prince Leopold Institute of Tropical Medicine, Belgium
- University of Copenhagen, Denmark
- Bernhard Nocht Institute, Germany
- University of Tübingen, Germany
- University of Barcelona, Spain
- Swiss Tropical Institute, Switzerland
- London School of Hygiene and Tropical Medicine, UK
- Centre for Disease Control and Prevention, USA
- University of North Carolina at Chapel Hill, USA
- Walter Reed Army Institute of Research, USA
